# Supplementary material for: A stochastic model for drought risk analysis in The Netherlands
Source: Copernicus journal article supplement (doi:10.5194/hess-2018-45), 2018-03-28
Supplement: Supplementary file [file hess-2018-45-AC1-supplement.pdf]

Dear F. Serinaldi

Thank you very much for reading our paper and providing your valuable comments. Below is a brief reply to some of your comments.

Best Regards

Ferdinand Diermanse (on behalf of the other authors)

**comment:**

*“Concerning the problem of reproduction of the cross-correlation, it is partly related to lack separability of spatio-temporal dependence structures and partly related to the effect of the marginal distributions on the correlation coefficients.”*

**response**

We consider rank correlations in our paper. The marginal distribution functions have no impact on rank correlations. Therefore, the differences in Figure 7 are fully explained by the autocorrelations, i.e. the temporal dependence structure.

**comment**

*“As usual in my review reports, I strongly suggest an accurate literature review before writing a paper”*

**response**

We have done a literature review, as can be seen in the paper. But indeed, we may have missed some references. So we are very grateful of you pointing out a number of relevant papers. We will include some of these an updated version of the paper.
